# Supplementary material for: Entrapment of [Ru(bpy)3]2+ in the anionic metal–organic framework: Novel photoluminescence behavior exhibiting dual emission at room temperature
Source: Royal Society of Chemistry journal article supplement (doi:10.1039/c0dt01647k), 2011-01-01
Supplement: c0dt01647k.pdf [file c0dt01647k.pdf]

## Supplementary Information

### **Entrapment of [Ru(bpy)<sub>3</sub>]<sup>2+</sup> in the anionic metal-organic framework: Novel photoluminescence behavior exhibiting dual emission at room temperature**

**Rupam Sen, Subratanath Koner<sup>\*</sup>, Ashis Bhattacharjee, Joachim Kusz, Yoshitaro  
Miyashita and Ken-Ichi Okamoto**

**Table S1.** Short contacts found in compounds **1** and **2**

| Compound <b>1</b> |              |            |              |
|-------------------|--------------|------------|--------------|
| C·····H (Å)       | C-H·····C(°) | H·····N(Å) | C-H·····N(°) |
| 2.899             | 132.32       | 2.884      | 128.92       |
| 2.872             | 157.57       | 2.911      | 124.43       |
| 2.990             | 104.84       |            |              |
| 2.939             | 134.24       |            |              |
| 2.951             | 107.03       |            |              |
| Compound <b>2</b> |              |            |              |
| C·····H (Å)       | C-H·····C(°) | H·····N(Å) | C-H·····N(°) |
| 2.744             | 156.71       | 2.879      | 174.05       |
| 2.879             | 121.19       | 2.939      | 122.78       |
| 2.660             | 150.32       | 2.772      | 165.18       |
| 2.836             | 117.17       | 2.782      | 109.36       |

|       |        |       |        |
|-------|--------|-------|--------|
| 2.995 | 128.64 | 2.880 | 140.12 |
|       |        | 2.896 | 150.51 |
|       |        | 2.618 | 138.81 |

---

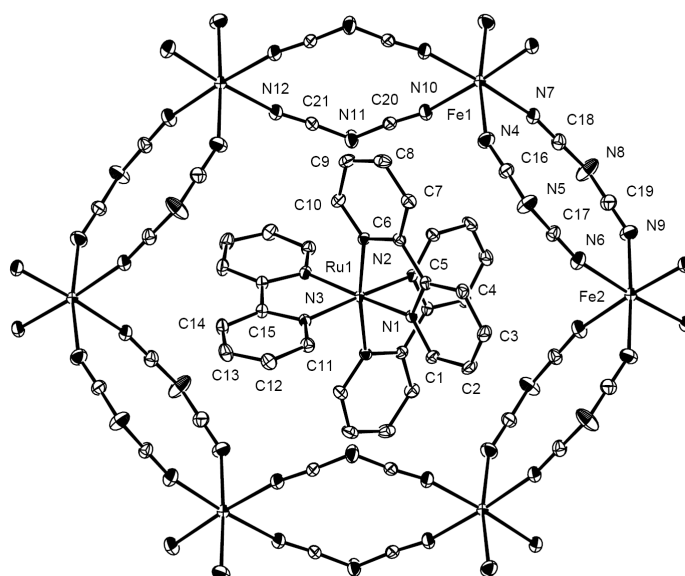

**Fig. S1.** ORTEP diagram of compound **2** showing atom numbering scheme

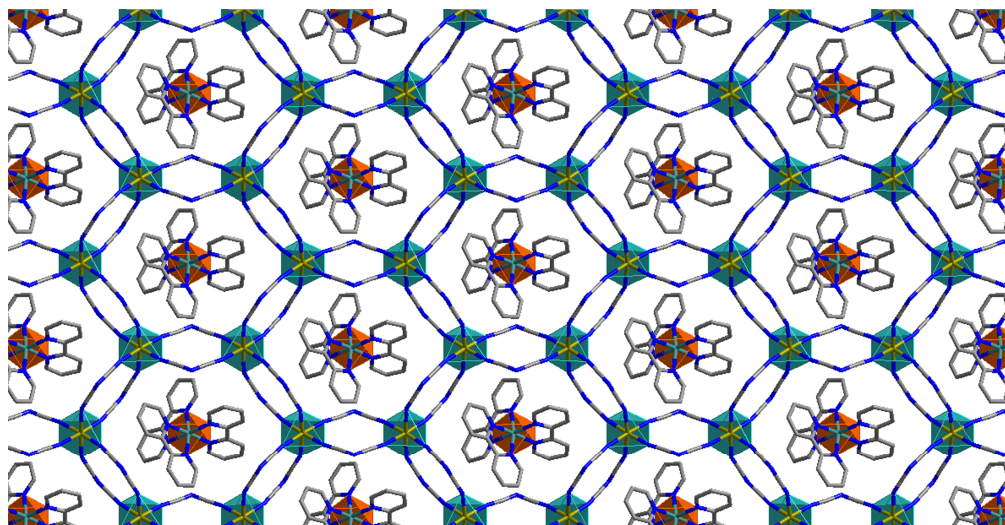

**Fig. S2.** Diagram showing entrapment of  $[\text{Ru}(\text{bpy})_3]^{2+}$  cations in the 2D anionic  $[\text{Fe}(\text{dca})_3]^-$  nano cavity in complex **2**. Red polyhedron represents the  $\text{Ru}^{\text{II}}$  sites while green polyhedron represents the  $\text{Fe}^{\text{II}}$  centers.

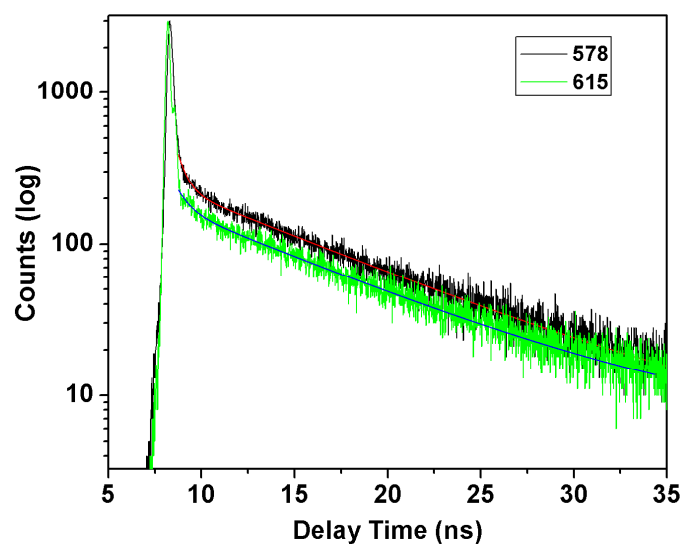

**Fig. S3.** Diagram showing emission decays of complex **2** monitored at different wavelengths following pulsed excitation ( $\lambda_{\text{ex}} = 440 \text{ nm}$ ) with biexponential fit

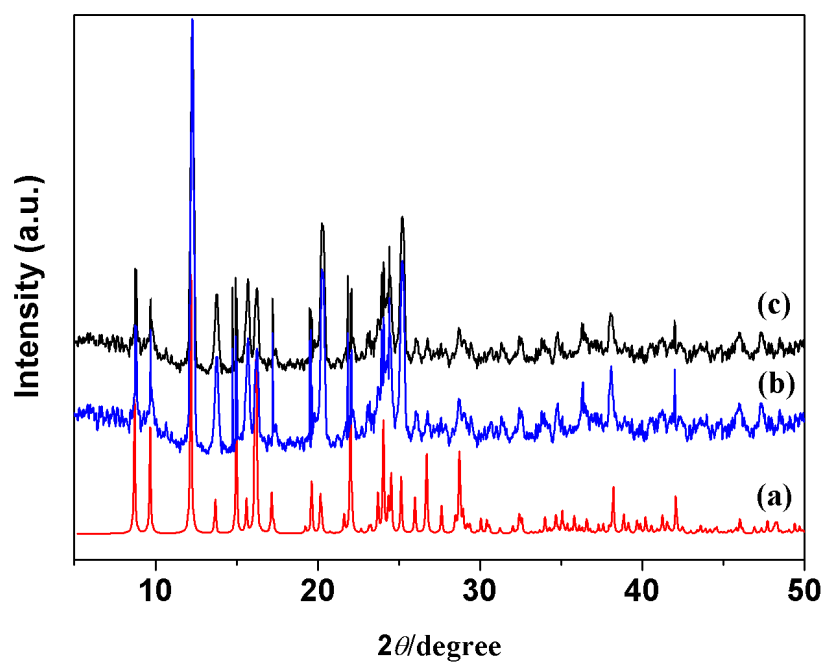

**Fig. S4.** Powder X-ray diffraction patterns of compound **1**; (—) simulated from single crystal data (a), (—) before irradiation (b) and (—) after irradiation (c).

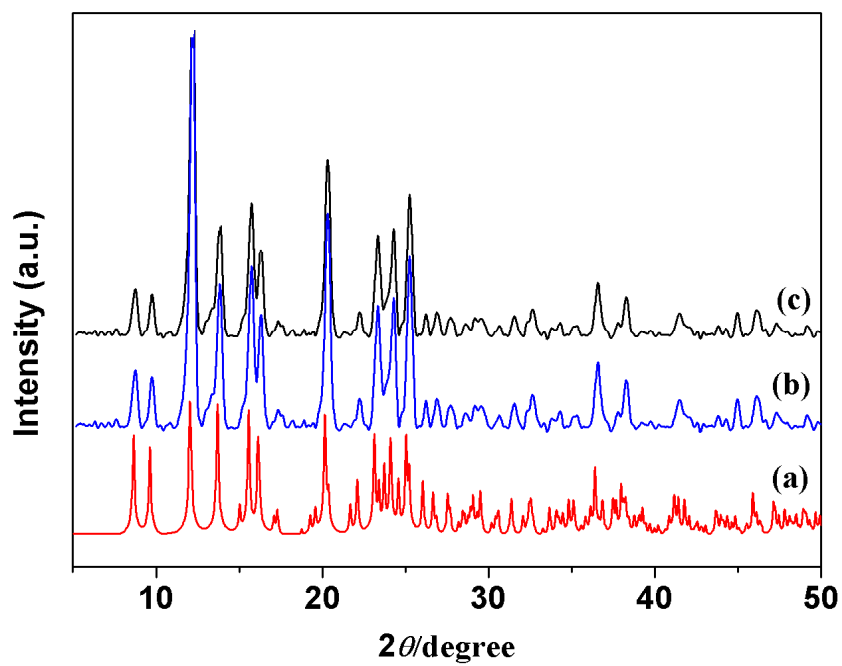

**Fig. S5.** Powder X-ray diffraction patterns of compound **2**; (—) simulated from single crystal data (a), (—) before irradiation (b) and (—) after irradiation (c).

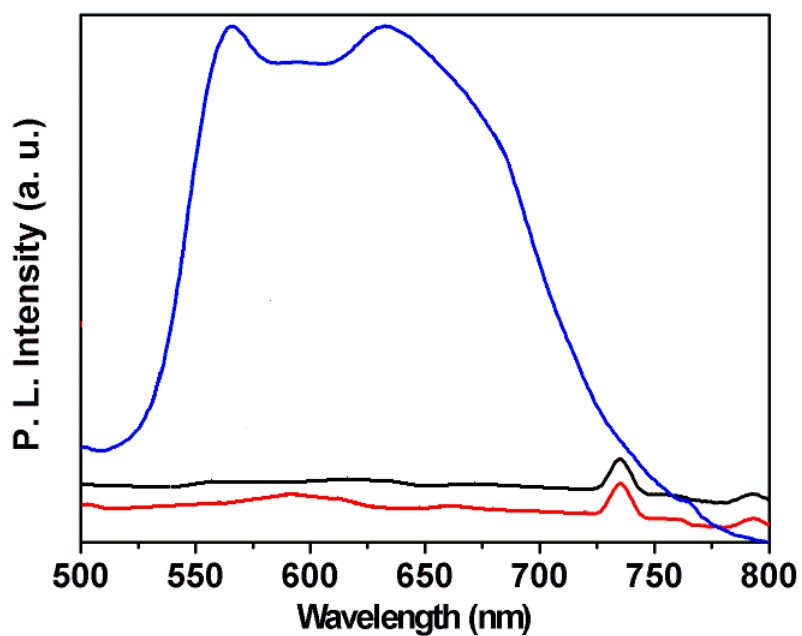

**Fig. S6.** Diagram showing steady-state emission profile of complex 1(—), (TPA)[Mn(dca)<sub>3</sub>] (—) and bipyridine (—) measured at room temperature (excitation wavelength = 440 nm).
